# Supplementary material for: Inhibition of Telomere Recombination by Inactivation of KEOPS Subunit Cgi121 Promotes Cell Longevity
Source: PubMed Central journal article supplement (PMC4378880; doi:10.1371/journal.pgen.1005071), 2015-03-30
Supplement: pgen.1005071.s001.pdf [file pgen.1005071.s001.pdf]

# S1 Figure

## clone #1

5' **CTTGGCCCTCCTCTTTTCITTTTTCGACCGAATTAATCCTAATCG**  
**GCAAAAAAGAAAAGCTCCGGATCAAGATTGTACGTAAGGTGACA**  
**AGCTATTTTTCAATAAAGAATATCTTCCACTACTGCCATCTGGCGTC**  
**ATAACTGCAAAGTACACATATATTACGATGCTGTTCTATTAATGCT**  
**TCCTATATTATATATATAGTAATGTCGTGATCTATGGTGCACTCTCA**  
**GTACAATCTGCTCTGATGGAATTCGTGTGTGGGTGTGGGTGTGGGT**  
**GTGTGGGTGTGTGGGTGTGTGGGTGTGGGTGTGGGTGTGGGTGTGG**  
**TGTGGGTGTGGGTGTGGGT**TATATATATGTCACTGTATTGCATGCT  
GGATGGTGTAGACAAGGCCGTAGGGACATATAGCATCTAGGAAG  
TAACCTTGTACGAAAATAGGCAATATTTCCCTGTTTAGGCGATTGGGA  
CGCAGATTTTAGTCCAACGATCTAGCGTCAAGGAATTTTTTATAGT  
GGGACATTGCACCAAGGAAGTAACCTTGATACGTCGTGGGTGAATG  
GGTCTGTTTTCTATTCCGGCGGGTAATACATTTTTGGGGGAAGTTT  
GTCTGTCTGACGCGCCATATGTAGGTACGCCAAAAAGGGCTCCTCT  
ACTTCAAGCGGAGGTGATACCTAATAAGGAAATGTAATTTAT  
AATTTCTATTATATTGGTCTTTTCGAGAGCGGAAGAAGTTGTAGGC  
TAAGCGCAGGCTAAGCGTAGGTCCATGTTGAAGTATCCAAGAGAA  
TATCCACGAATCCTGGTTCTCCTCGACTAAGCAGATAGTTAAGATAC  
TGTGCACCATGGAATTGA 3'

## clone #2

5' **CTTGGCCCTCCTCTTTTCITTTTTCGACCGAATTAATCCTAATCG**  
**GCAAAAAAGAAAAGCTCCGGATCAAGATTGTACGTAAGGTGACA**  
**AGCTATTTTTCAATAAAGAATATCTTCCACTACTGCCATCTGGCGTC**  
**ATAACTGCAAAGTACACATATATTACGATGCTGTTCTATTAATGCT**  
**TCCTATATTATATATATAGTAATGTCGTGATCTATGGTGCACTCTCA**  
**GTACAATCTGCTCTGATGGAATTCGTGTGTGGGTGTGGGTGTGGGT**  
**GTGTGGGTGTGTGGGTGTGTGGGTGTGGGTGTGGGTGTGGGTGTGG**  
**TGTGGGTGTGGTGGGAATTCCTATACTGTGTGGGTGTGGGTGTGGG**  
**GTGTGTGGGTGTGGGTGTGGGTGTGGGTGTGGGTGTGGGTGTGGGT**  
**GTGGGTGTGGGTGTGGGTGTGGGTGTGGGTGTGGGTGTGGGTGTGGT**  
**GGGTGTGGGT**TATATATATGTCACTGTATTGCATGCTGGATGGTG  
TTAGACAAGGCCGTAGGGACATATAGCATCTAGGAAGTAACCTTGT  
ACGAAAATAGGCAATATTTCCCTGTTTAGGCGATTGGGACGCAGATT  
TTAGTCCAACGATCTAGCGTCAAGGAATTTTTTATAGTGGGACATT  
GCACCAAGGAAGTAACCTTGATACGTCGTGGGTGAATGGGTCTGTTT  
TCTTATTCGGCGGGTAATACATTTTTGGGGGAAGTTTGTCTGTCTG  
ACGCGCCATATGTAGGTACGCCAAAAAGGGCTCCTCTACTTCAAG  
CGCGAGGTCTGATACCTAATAAGGAAATGTAATTTATACTTTCTAT  
TATATTGGTCTTTTCGAGAGCGGAAGAAGTTGTAGGCTAAGCGCAG  
GCTAAGCGTAGGTCCATGTTTGAAGTATCCAAGAGAATATCCACGA  
ATCCTGGTTCTCCTCGACTAAGCAGATAGTTAAGATACTGTGCACC  
ATGGAAATTGA 3'

## clone #3

5' **CTTGGCCCTCCTCTTTTCITTTTTCGACCGAATTAATCCTAATCG**  
**GCAAAAAAGAAAAGCTCCGGATCAAGATTGTACGTAAGGTGACA**  
**AGCTATTTTTCAATAAAGAATATCTTCCACTACTGCCATCTGGCGTC**  
**ATAACTGCAAAGTACACATATATTACGATGCTGTTCTATTAATGCT**  
**TCCTATATTATATATATAGTAATGTCGTGATCTATGGTGCACTCTCA**  
**GTACAATCTGCTCTGATGGAATTCGTGTGTGGGTGTGGGTGTGGGT**  
**GTGTGGGTGTGTGGGTGTGTGGGTGTGGGTGTGGGTGTGGGTGTGG**  
**TGTGGGTGTGGTGGGAATTCCTATACTGTGTGGGTGTGGGTGTGGT**  
**GGGTGTGTGGGTGTGGGTGTGGGTGTGGGTGTGGGTGTGGGTGTGGT**  
**TGGGTGTGGGTGTGGGTGTGGGTGTGGGTGTGGGTGTGGGTGTGGT**  
**GTGGGTGTGGGTGTGGGTGTGGGTGTGGGTGTGGGTGTGGGTGTGGT**  
**GTGTGTGGGTGTGGGTGTGGGT**TATATATATGTCACTGTATTGCAT  
GCTGGATGGTGTAGACAAGGCCGTAGGGACATATAGCATCTAGG  
AAGTAACCTTGTACGAAAATAGGCAATATTTCCCTGTTTAGGCGATTG  
TGACGCAGATTTTAGTCCAACGATCTAGCGTCAAGGAATTTTTTAT  
AGTGGGACATTGCACCAAGGAAGTAACCTTGATACGTCGTGGGTGA  
ATGGGTCTGTCTTCTTATTCGGCGGGTAATACATTTTTGGGGGA  
GTTTGTCTGTCTGACGCGCCATATGTAGGTACGCCAAAAAGGGCTC  
CTCTACTTCAAGCGGAGGTGATACCTAATAAGGAAATGTAAT  
TTATAACTTTTTATTATATTGGTCTTTTCGAGAGCGGAACGTAGGTC  
CATGTTAAAGTATCCAAGAGAATATCCACGAAGCGGCTGAGCAAC  
GAACAGAATCCTGGTTCTCCTCGACTAAGCAGATAGTTAAGATACT  
GTGCACCATGGAATTGA 3'
