# Supplementary material for: Inhibition of Telomere Recombination by Inactivation of KEOPS Subunit Cgi121 Promotes Cell Longevity
Source: PubMed Central journal article supplement (PMC4378880; doi:10.1371/journal.pgen.1005071), 2015-03-30

## S4 Figure

**A**

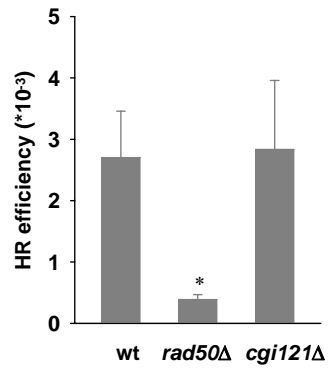

**B**

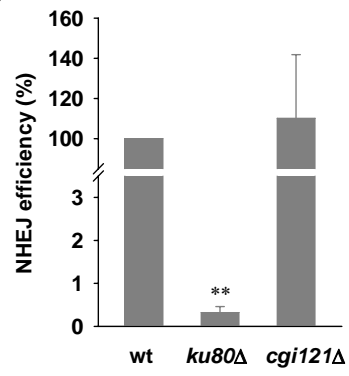

**C**

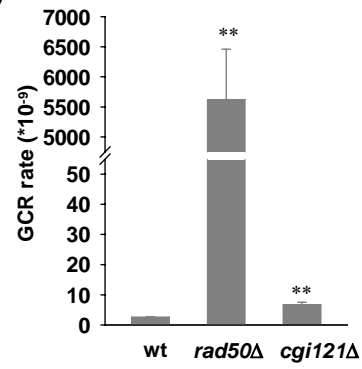

Supplement: pgen.1005071.s004.pdf [file pgen.1005071.s004.pdf]
