# Supplementary material for: Inhibition of Telomere Recombination by Inactivation of KEOPS Subunit Cgi121 Promotes Cell Longevity
Source: PubMed Central journal article supplement (PMC4378880; doi:10.1371/journal.pgen.1005071), 2015-03-30

# S5 Figure

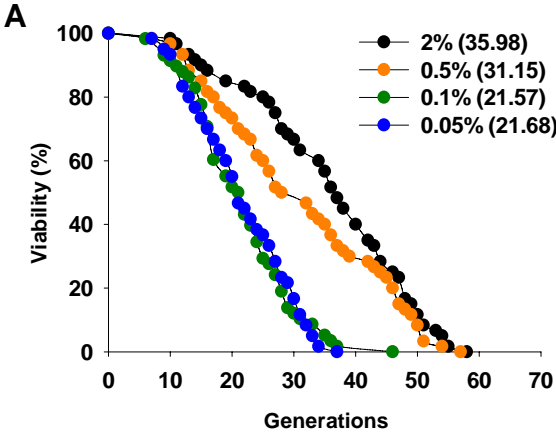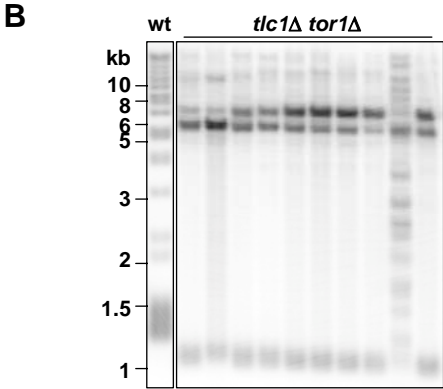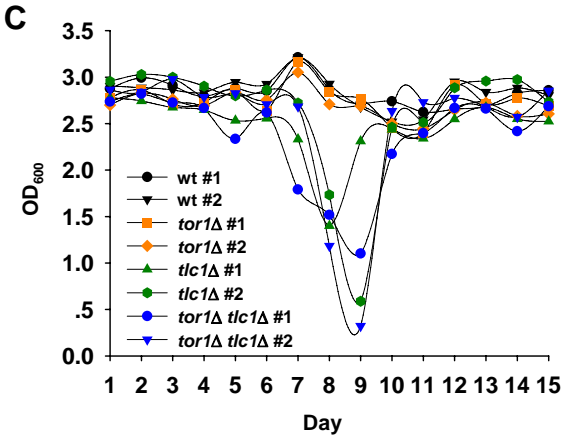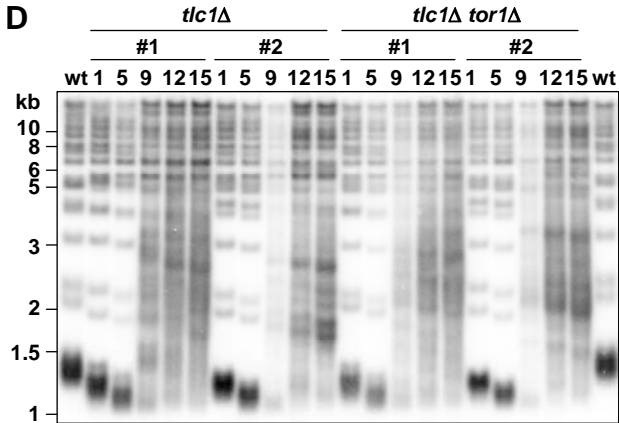

Supplement: pgen.1005071.s005.pdf [file pgen.1005071.s005.pdf]
