# Supplementary material for: Inhibition of Telomere Recombination by Inactivation of KEOPS Subunit Cgi121 Promotes Cell Longevity
Source: PubMed Central journal article supplement (PMC4378880; doi:10.1371/journal.pgen.1005071), 2015-03-30
Supplement: pgen.1005071.s008.pdf [file pgen.1005071.s008.pdf]

S2 Table. Statistical data of lifespan experiments in this study.

| Figure | Test strain                         | Test LS | Test cell # | Reference strain              | Ref LS | Ref cell # | <i>p</i> value |
|--------|-------------------------------------|---------|-------------|-------------------------------|--------|------------|----------------|
| 1A     | <i>tlc1Δ</i> Type I                 | 4.8     | 60          | wt                            | 23.04  | 53         | 0.0000         |
|        | <i>tlc1Δ</i> Type II                | 13.55   | 60          | wt                            | 23.04  | 53         | 0.0000         |
| 1C     | <i>tlc1Δ</i> Type I                 | 4.85    | 53          | wt                            | 27.2   | 50         | 0.0000         |
|        | <i>tlc1Δ</i> Type I<br><i>TLC1</i>  | 11.62   | 60          | wt                            | 27.2   | 50         | 0.0000         |
|        | <i>tlc1Δ</i> Type I<br><i>TLC1</i>  | 11.62   | 60          | <i>tlc1Δ</i> Type I           | 4.85   | 53         | 0.0000         |
| 1D     | <i>tlc1Δ</i> Type II                | 14.56   | 59          | wt                            | 27.2   | 55         | 0.0000         |
|        | <i>tlc1Δ</i> Type II<br><i>TLC1</i> | 26.17   | 52          | wt                            | 27.2   | 55         | 0.4629         |
|        | <i>tlc1Δ</i> Type II<br><i>TLC1</i> | 26.17   | 52          | <i>tlc1Δ</i> Type II          | 14.56  | 59         | 0.0000         |
| 3C     | <i>cgi121Δ</i>                      | 33.03   | 60          | wt                            | 21.53  | 58         | 0.0000         |
| 3D     | <i>tlc1Δ</i>                        | 21.33   | 60          | wt                            | 25.91  | 53         | 0.0185         |
|        | <i>cgi121Δ</i>                      | 45.26   | 57          | wt                            | 25.91  | 53         | 0.0000         |
|        | <i>tlc1Δ cgi121Δ</i>                | 29.42   | 60          | wt                            | 25.91  | 53         | 0.0284         |
|        | <i>tlc1Δ cgi121Δ</i>                | 29.42   | 60          | <i>tlc1Δ</i>                  | 21.33  | 60         | 0.0000         |
|        | <i>tlc1Δ cgi121Δ</i>                | 29.42   | 60          | <i>cgi121Δ</i>                | 45.26  | 57         | 0.0000         |
| 3E     | <i>tlc1Δ</i> long tel               | 26.35   | 60          | wt long tel                   | 25.06  | 54         | 0.6074         |
|        | <i>cgi121Δ</i> long tel             | 35.71   | 52          | wt long tel                   | 25.06  | 54         | 0.0000         |
|        | <i>tlc1Δ cgi121Δ</i> long tel       | 35.95   | 60          | wt long tel                   | 25.06  | 54         | 0.0000         |
|        | <i>tlc1Δ cgi121Δ</i> long tel       | 35.95   | 60          | <i>tlc1Δ</i> long tel         | 26.35  | 60         | 0.0000         |
|        | <i>tlc1Δ cgi121Δ</i> long tel       | 35.95   | 60          | <i>cgi121Δ</i> long tel       | 35.71  | 52         | 0.8657         |
| 4A     | <i>yku80Δ</i> vector                | 20.46   | 54          | <i>yku80Δ</i><br><i>YKU80</i> | 28.02  | 55         | 0.0000         |
|        | <i>yku80Δ</i><br><i>yku80-4</i>     | 22.31   | 54          | <i>yku80Δ</i><br><i>YKU80</i> | 28.02  | 55         | 0.0003         |
|        | <i>yku80Δ</i><br><i>yku80-4</i>     | 22.31   | 54          | <i>yku80Δ</i> vector          | 20.46  | 54         | 0.2831         |
| 4B     | <i>YKU80</i><br><i>cgi121Δ</i>      | 40.93   | 55          | <i>YKU80</i>                  | 27.22  | 55         | 0.0000         |
|        | <i>yku80-4</i>                      | 20.45   | 53          | <i>YKU80</i>                  | 27.22  | 55         | 0.0013         |
|        | <i>yku80-4</i><br><i>cgi121Δ</i>    | 42.42   | 55          | <i>YKU80</i>                  | 27.22  | 55         | 0.2925         |
|        | <i>yku80-4</i><br><i>cgi121Δ</i>    | 42.42   | 55          | <i>yku80-4</i>                | 20.45  | 53         | 0.0000         |

|     |                            |       |    |                          |       |    |        |
|-----|----------------------------|-------|----|--------------------------|-------|----|--------|
|     | <i>yku80-4<br/>cgl121Δ</i> | 42.42 | 55 | <i>YKU80<br/>cgl121Δ</i> | 40.93 | 55 | 0.4300 |
| 5B  | <i>fob1Δ</i>               | 36.05 | 59 | wt                       | 26.35 | 60 | 0.0000 |
|     | <i>cgl121Δ</i>             | 35.74 | 57 | wt                       | 26.35 | 60 | 0.0003 |
|     | <i>fob1Δ cgl121Δ</i>       | 48.2  | 59 | wt                       | 26.35 | 60 | 0.0000 |
|     | <i>fob1Δ cgl121Δ</i>       | 48.2  | 59 | <i>fob1Δ</i>             | 36.05 | 59 | 0.0001 |
|     | <i>fob1Δ cgl121Δ</i>       | 48.2  | 59 | <i>cgl121Δ</i>           | 35.74 | 57 | 0.0002 |
| 6A  | <i>cgl121Δ</i>             | 28.88 | 59 | wt                       | 21.2  | 60 | 0.0001 |
|     | wt + CR                    | 25.3  | 60 | wt                       | 21.2  | 60 | 0.0141 |
|     | <i>cgl121Δ</i> + CR        | 20.92 | 60 | wt                       | 21.2  | 60 | 0.8277 |
|     | <i>cgl121Δ</i> + CR        | 20.92 | 60 | <i>cgl121Δ</i>           | 28.88 | 59 | 0.0000 |
|     | <i>cgl121Δ</i> + CR        | 20.92 | 60 | wt + CR                  | 25.3  | 60 | 0.0091 |
| 6B  | <i>tor1Δ</i>               | 36.49 | 57 | wt                       | 28.12 | 58 | 0.0005 |
|     | <i>cgl121Δ</i>             | 42.82 | 60 | wt                       | 28.12 | 58 | 0.0000 |
|     | <i>fob1Δ cgl121Δ</i>       | 16.84 | 58 | wt                       | 28.12 | 58 | 0.0000 |
|     | <i>fob1Δ cgl121Δ</i>       | 16.84 | 58 | <i>tor1Δ</i>             | 36.49 | 57 | 0.0000 |
|     | <i>fob1Δ cgl121Δ</i>       | 16.84 | 58 | <i>cgl121Δ</i>           | 42.82 | 60 | 0.0000 |
| S2A | BY4741<br><i>cgl121Δ</i>   | 41.91 | 58 | BY4741                   | 28.11 | 55 | 0.0000 |
| S2B | <i>est2Δ</i>               | 15.57 | 60 | wt                       | 23.82 | 55 | 0.0000 |
|     | <i>cgl121Δ</i>             | 34.16 | 58 | wt                       | 23.82 | 55 | 0.0000 |
|     | <i>est2Δ cgl121Δ</i>       | 26.08 | 60 | wt                       | 23.82 | 55 | 0.1380 |
|     | <i>est2Δ cgl121Δ</i>       | 26.08 | 60 | <i>est2Δ</i>             | 15.57 | 60 | 0.0000 |
|     | <i>est2Δ cgl121Δ</i>       | 26.08 | 60 | <i>cgl121Δ</i>           | 34.16 | 58 | 0.0014 |
| S2D | wt long tel                | 25.23 | 52 | wt normal tel            | 26.83 | 52 | 0.3625 |
| S3  | <i>ku80Δ</i>               | 22.13 | 53 | wt                       | 26.96 | 55 | 0.0030 |
|     | <i>cgl121Δ</i>             | 38.18 | 55 | wt                       | 26.96 | 55 | 0.0000 |
|     | <i>ku80Δ<br/>cgl121Δ</i>   | 25.02 | 55 | wt                       | 26.96 | 55 | 0.2925 |
|     | <i>ku80Δ<br/>cgl121Δ</i>   | 25.02 | 55 | <i>ku80Δ</i>             | 22.13 | 53 | 0.3321 |
|     | <i>ku80Δ<br/>cgl121Δ</i>   | 25.02 | 55 | <i>cgl121Δ</i>           | 38.18 | 55 | 0.0000 |
| S5A | <i>cgl121Δ</i> 0.5%        | 31.15 | 60 | <i>cgl121Δ</i> 2%        | 35.98 | 60 | 0.0472 |
|     | <i>cgl121Δ</i> 0.1%        | 21.57 | 58 | <i>cgl121Δ</i> 2%        | 35.98 | 60 | 0.0000 |
|     | <i>cgl121Δ</i><br>0.05%    | 21.68 | 60 | <i>cgl121Δ</i> 2%        | 35.98 | 60 | 0.0000 |
| S6B | <i>BUD32</i> oe            | 25.28 | 54 | vector                   | 25.58 | 53 | 0.9207 |
|     | <i>KAE1</i> oe             | 24.41 | 54 | vector                   | 25.58 | 53 | 0.4777 |
| S6C | <i>CGH121</i> oe           | 25.83 | 52 | vector                   | 26.89 | 55 | 0.3375 |
|     | <i>GON7</i> oe             | 26.60 | 55 | vector                   | 26.89 | 55 | 0.7972 |
|     | <i>PCC1</i> oe             | 24.36 | 50 | vector                   | 26.89 | 55 | 0.0833 |
