# Supplementary material for: Inhibition of Telomere Recombination by Inactivation of KEOPS Subunit Cgi121 Promotes Cell Longevity
Source: PubMed Central journal article supplement (PMC4378880; doi:10.1371/journal.pgen.1005071), 2015-03-30
Supplement: pgen.1005071.s009.pdf [file pgen.1005071.s009.pdf]

## **S1 Text. Supporting materials and methods.**

### General HR and GCR

General HR rate in haploid cells were detected as described previously [78,79]. GCR rate was determined as described previously [80]. \* $p < 0.05$  and \*\* $p < 0.01$ .

### NHEJ

Yeast cells were transformed with equal amount of undigested or EcoRI-linearized plasmid pRS316 and plated to uracil- YC medium. NHEJ efficiency was determined by dividing the number of colonies transformed with digested plasmid by that with undigested plasmid. The efficiency of mutant strains were normalized to that of wild-type cells whose value was set to 1. \* $p < 0.05$  and \*\* $p < 0.01$ .

### Growth curve

Growth curve assay was performed as described previously [35].

### qRT-PCR

RNA was extracted and reverse-transcribed, and quantitative Real-time PCR was performed as described previously [81]. At least three biological replicas were done for all the mRNA analysis.

### Supporting References

35. Hu Y, Tang HB, Liu NN, Tong XJ, Dang W, et al. (2013) Telomerase-null survivor screening identifies novel telomere recombination regulators. *PLoS Genet* 9: e1003208.
78. Aguilera A, Klein HL (1988) Genetic control of intrachromosomal recombination in *Saccharomyces cerevisiae*. I. Isolation and genetic characterization of hyper-recombination mutations. *Genetics* 119: 779-790.
79. Klein HL (1997) RDH54, a RAD54 homologue in *Saccharomyces cerevisiae*, is required for mitotic diploid-specific recombination and repair and for meiosis. *Genetics* 147: 1533-1543.
80. Chen C, Kolodner RD (1999) Gross chromosomal rearrangements in *Saccharomyces cerevisiae* replication and recombination defective mutants. *Nat Genet* 23: 81-85.
81. Peng J, Zhou JQ (2012) The tail-module of yeast Mediator complex is required for telomere heterochromatin maintenance. *Nucleic Acids Res* 40: 581-593.
